# Supplementary material for: Vapor swellable colloidal photonic crystals with pressure tunability
Source: Royal Society of Chemistry journal article supplement (doi:10.1039/b410284n), 2004-11-17
Supplement: b410284n.pdf [file b410284n.pdf]

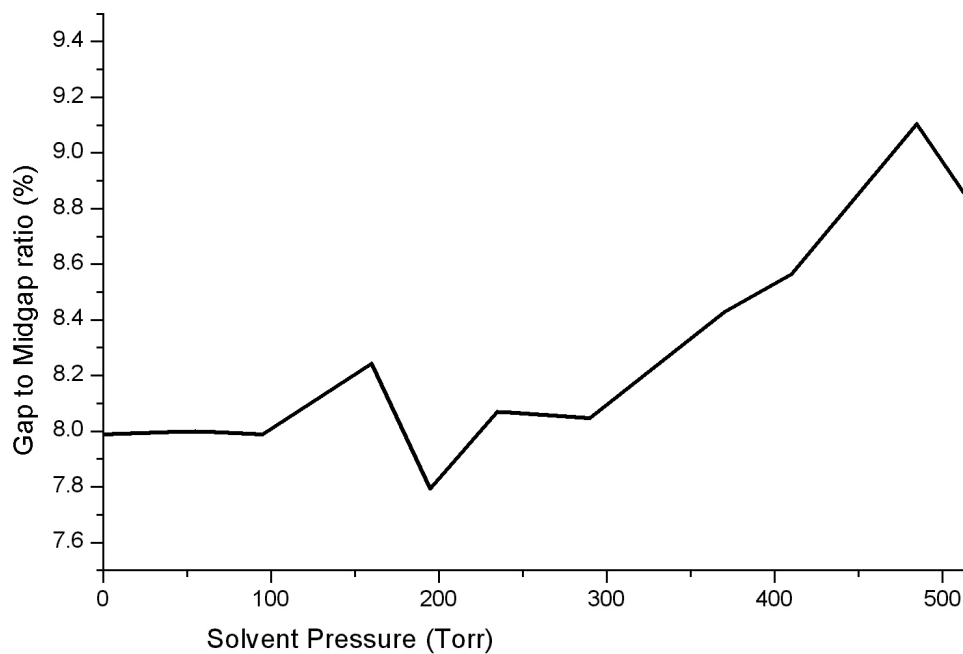

**Figure S1**

*Arsenault et al.*

**Figure S1** Plot of the gap-to-midgap ratio of the first Bragg diffraction peak for one of the pressure-sensitive colloidal photonic crystals illustrated in this work, showing an increase in peak width with increasing swelling.
